# Supplementary material for: Atmospheric chemistry of iodine anions: elementary reactions of I−, IO−, and IO2− with ozone studied in the gas-phase at 300 K using an ion trap
Source: Royal Society of Chemistry journal article supplement (doi:10.1039/c8cp05721d), 2018-01-01
Supplement: c8cp05721d1.zip [file c8cp05721d1.zip]

Cite this: DOI: 10.1039/xxxxxxxxxx

# Atmospheric chemistry of iodine anions: elementary reactions of $\text{I}^-$ , $\text{IO}^-$ , and $\text{IO}_2^-$ with ozone studied at 300 K in an ion trap

Ricky Teiwes,<sup>a</sup> Jonas Elm,<sup>b</sup> Karsten Handrup,<sup>a</sup> Ellen P. Jensen,<sup>a</sup> Merete Bilde,<sup>b</sup> and Henrik B. Pedersen<sup>\*a</sup>

## 1 Supplementary information

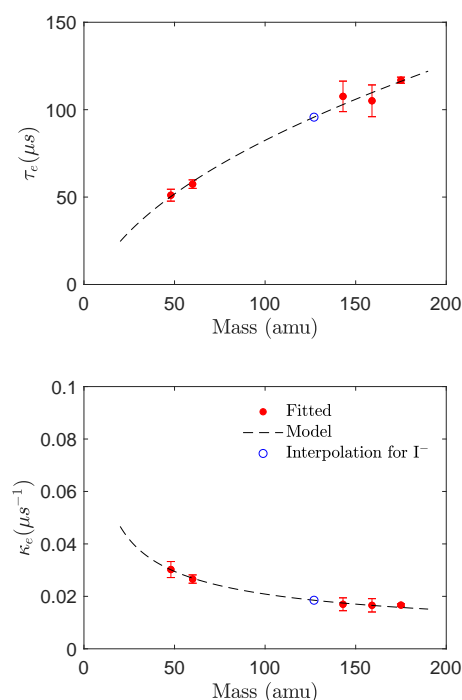

**Fig. S1** Representation of the time-of-flight spectra (see Fig. 2) by the formula in Eq. (1). (a) Fitted parameters (red points) of the minimum time  $\tau_e$ . The dashed black line shows a fit with a model function  $\tau_e = a \times \sqrt{m_p} + b$ , where  $a$  and  $b$  are determined by the fit. The blue circle represents the interpolated value for  $\text{I}^-$ . (b) Fitted parameters (red points) of the decay rate  $\kappa_e$ . The dashed black line shows a fit with a model function  $\kappa_e = a / \sqrt{b \times m_p}$ , where  $a$  and  $b$  are determined by the fit. The blue circle represents the interpolated value for  $\text{I}^-$ .

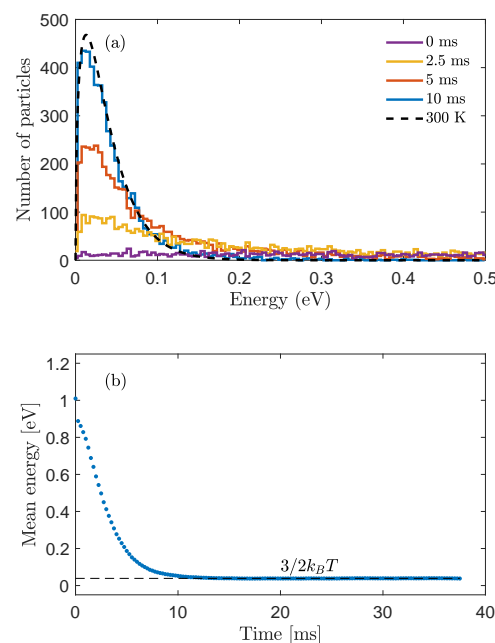

**Fig. S2** Results of the Monte Carlo simulation on the thermalization of  $\text{I}^-$  ions in trap through elastic collisions with  $\text{O}_2$  and  $\text{O}_3$  at 300 K, a total pressure of  $p_T = p_{\text{O}_2} + p_{\text{O}_3} = 5 \times 10^{-5}$  mbar, and an ozone fraction of  $p_{\text{O}_3}/p_T = 5\%$ . For the simulation, 5000 ions were initiated with a flat distribution of energies in the range 0–2 eV. Only elastic collisions were considered with rates  $k_L = 5.8 \times 10^{-10} \text{ cm}^3/\text{s}$  for the  $\text{I}^- + \text{O}_2$  and  $k_L = 6.7 \times 10^{-10} \text{ cm}^3/\text{s}$  for the  $\text{I}^- + \text{O}_3$  system. The effect of reactive collisions were not considered in the shown simulation. (a) Energy distributions at four different times after the start of the simulation as well as the Maxwell-Boltzmann distribution at 300 K (dashed black line). (b) Evolution of the mean energy of  $\text{I}^-$  as a function of trapping time. The horizontal line corresponds to the mean value for a thermal distribution at 300 K.

<sup>a</sup> Department of Physics and Astronomy, Aarhus University, DK-8000 Aarhus C, Denmark. Tel: 45 8715 5653; E-mail: hbp@phys.au.dk

<sup>b</sup> Department of Chemistry, Aarhus University, DK-8000 Aarhus C, Denmark

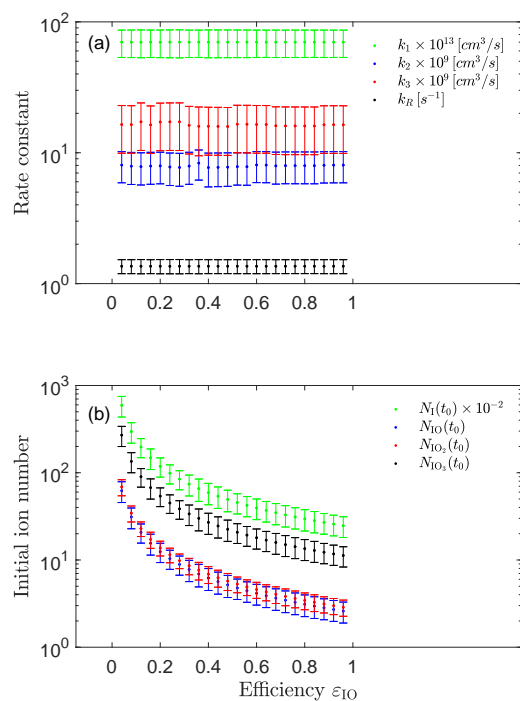

**Fig. S3** Illustration of the robustness of the least squares fitting used to determine the experimental reaction rate constants  $k_{1-3}$ . The figure shows the determined values of (a) reaction rate constants  $k_{1-3}$  and background rate  $k_R$  and (b) the initial ion numbers  $N_p(t_0)$  as a function of a fixed value of the detection efficiency  $\varepsilon_{\text{IO}} = \varepsilon_{\text{IO}_2} = \varepsilon_{\text{IO}_3}$  and with  $\varepsilon_{\text{I}} = 0.11 \times \varepsilon_{\text{IO}}$ .

**Table S1** Reaction rate constants for the reaction R1-R3 obtained from fits to eight different data sets obtained with different ozone concentrations and trap settings. These data are displayed graphically in Fig. 6(b).

| $n_{O_3} (\text{cm}^{-3})$ | $V_{RF} (V)$ | $k_1 (\text{cm}^3/\text{s})$     | $k_2 (\text{cm}^3/\text{s})$    | $k_3 (\text{cm}^3/\text{s})$     |
|----------------------------|--------------|----------------------------------|---------------------------------|----------------------------------|
| $4.2 \times 10^{10}$       | 120          | $(12.6 \pm 3.1) \times 10^{-12}$ | $(11.8 \pm 5.6) \times 10^{-9}$ | $(20.5 \pm 9.7) \times 10^{-9}$  |
| $7.7 \times 10^{10}$       | 120          | $(6.6 \pm 3.1) \times 10^{-12}$  | $(7.6 \pm 4.1) \times 10^{-9}$  | $(14.6 \pm 9.6) \times 10^{-9}$  |
| $5.2 \times 10^{10}$       | 120          | $(5.6 \pm 3.1) \times 10^{-12}$  | $(8.6 \pm 3.9) \times 10^{-9}$  | $(15.2 \pm 7.7) \times 10^{-9}$  |
| $2.5 \times 10^{10}$       | 120          | $(6.3 \pm 3.1) \times 10^{-12}$  | $(11.6 \pm 4.0) \times 10^{-9}$ | $(16.1 \pm 6.4) \times 10^{-9}$  |
| $5.2 \times 10^{10}$       | 120          | $(6.0 \pm 3.1) \times 10^{-12}$  | $(8.9 \pm 7.1) \times 10^{-9}$  | $(15.5 \pm 12.6) \times 10^{-9}$ |
| $4.6 \times 10^{10}$       | 120          | $(11.0 \pm 3.1) \times 10^{-12}$ | $(10.5 \pm 4.7) \times 10^{-9}$ | $(16.5 \pm 7.7) \times 10^{-9}$  |
| $4.8 \times 10^{10}$       | 60           | $(10.8 \pm 3.1) \times 10^{-12}$ | $(9.4 \pm 3.8) \times 10^{-9}$  | $(15.3 \pm 6.5) \times 10^{-9}$  |
| $1.6 \times 10^{10}$       | 60           | $(8.6 \pm 3.1) \times 10^{-12}$  | $(13.7 \pm 4.6) \times 10^{-9}$ | $(17.7 \pm 6.5) \times 10^{-9}$  |
